# Supplementary material for: Efficacy of Cold Atmospheric Plasma vs. Chemotherapy in Triple-Negative Breast Cancer: A Systematic Review
Source: MDPI journal article supplement (doi:10.3390/ijms25063254), 2024-03-13
Supplement: s1 [file s1]

# Supplemental Material

## 1. Search strategy

### 1.1 PubMed

#### 1.1.1 TNBC and Chemotherapy

("Triple Negative Breast Neoplasms"[Mesh] OR "Triple Negative Breast Neoplasm\*" OR "ER-Negative PR-Negative HER2-Negative Breast Neoplasm\*" OR "ER Negative PR Negative HER2 Negative Breast Neoplasm\*" OR "Triple-Negative Breast Cancer\*" OR "Breast Cancer, Triple-Negative" OR "Breast Cancers, Triple-Negative" OR "Triple-Negative Breast Neoplasm\*" OR "Breast Neoplasm, Triple-Negative" OR "Breast Neoplasms, Triple-Negative" OR "ER-Negative PR-Negative HER2-Negative Breast Cancer\*" OR "ER Negative PR Negative HER2 Negative Breast Cancer\*" OR "Triple Negative Breast Cancer\*" OR TNBC OR "HCC2157" OR "HCC1599" OR "HCC1937" OR "HCC1143" OR "MDA-MB-468" OR "HCC38" OR "HCC70" OR "HCC1806" OR "HCC1187" OR "DU4475" OR "BT-549" OR "Hs 578T" OR "MDA-MB-231" OR "MDA-MDB-231" OR "MDA-MB-436" OR "MDA-MB-157" OR "MDA-MB-453" OR "BT-20" OR "HCC1395") AND ("Doxorubicin"[Mesh] OR "Doxorubicin\*" OR "Farmiblastina" OR "Ribodoxo" OR "Rubex" OR "Adriamycin" OR "Adriblastin\*" OR "Adriablastin\*" OR "Adrimedac" OR "DOXO-cell" OR "DOXO cell" OR "Doxolem" OR "Doxotec" OR "Myocet" OR "Onkodox" OR "Epirubicin"[Mesh] OR "Epirubicin" OR "4'-Epidoxorubicin" OR "4' Epidoxorubicin" OR "4'-Epi-Doxorubicin" OR "4' Epi Doxorubicin" OR "4'-Epi-Adriamycin" OR "4' Epi Adriamycin" OR "4'-Epiadriamycin" OR "4' Epiadriamycin" OR "4'-Epi-DXR" OR "4' Epi DXR" OR "EPI-cell" OR "EPI cell" OR "EPIcell" OR "Epillem" OR "Farmorubicin\*" OR "IMI-28" OR "IMI 28" OR "IMI28" OR "NSC-256942" OR "NSC 256942" OR "NSC256942" OR "Ellence" OR "Pharmorubicin" OR "Cyclophosphamide"[Mesh] OR "Cyclophosphamide" OR "Sendoxan" OR "B-518" OR "B 518" OR "B518" OR "Cytophosphan\*" OR "Cytoxan" OR "Endoxan" OR "Neosar" OR "NSC-26271" OR "NSC 26271" OR "NSC26271" OR "Procytox" OR "(+,-)-2-(bis(2-Chloroethyl)amino)tetrahydro-2H-1,3,2-oxazaphosphorine 2-Oxide Monohydrate" OR "Cyclophosphane" OR "Paclitaxel"[Mesh] OR "Paclitaxel" OR "Anzatax" OR "NSC-125973" OR "NSC 125973" OR "NSC125973" OR "Taxol" OR "Paxene" OR "Praxel" OR "7-epi-Taxol" OR "Onxol" OR "Docetaxel"[Mesh] OR "Docetaxel" OR "Docetaxol" OR "Taxoltere Metro" OR "RP 56976" OR "RP-56976" OR "RP56976" OR "Taxotere" OR "N-Debenzoyl-N-tert-butoxycarbonyl-10-deacetyltaxol" OR "N Debenzoyl N tert butoxycarbonyl 10 deacetyltaxol" OR "NSC 628503" OR "Carboplatin"[Mesh] OR "Carboplat\*" OR "cis-Diammine(cyclobutanedicarboxylato)platinum II" OR "CBDCA" OR "Paraplatin\*" OR "Platinwas" OR "Ribocarbo" OR "Neocarbo" OR "Carbosin" OR "Carbotec" OR "Ercar" OR "JM-8" OR "JM 8" OR "JM8" OR "Nealorin" OR "NSC-241240" OR "NSC 241240" OR "NSC241240" OR "Blastocarb" OR "Capecitabine"[Mesh] OR "Capecitabine" OR "N(4)-pentyloxycarbonyl-5'-deoxy-5'-fluorocytidine" OR "Xeloda" OR "olaparib" [Supplementary Concept] OR olaparib OR "AZD 2281" OR "AZD2281" OR "AZD-2281" OR "AZD221" OR "Lynparza"), using language filters, including articles written in Portuguese, English, Spanish and French.

#### 1.1.2 TNBC and Cold Plasma

("Triple Negative Breast Neoplasms"[Mesh] OR "Triple Negative Breast Neoplasm\*" OR "ER-Negative PR-Negative HER2-Negative Breast Neoplasm\*" OR "ER Negative PR Negative HER2 Negative Breast Neoplasm\*" OR "Triple-Negative Breast Cancer\*" OR "Breast Cancer, Triple-Negative" OR "Breast Cancers, Triple-Negative" OR "Triple-Negative Breast Neoplasm\*" OR "Breast Neoplasm, Triple-Negative" OR "Breast Neoplasms, Triple-Negative" OR "ER-Negative PR-Negative HER2-Negative Breast Cancer\*" OR "ER Negative PR Negative HER2 Negative Breast Cancer\*" OR "Triple Negative Breast Cancer\*" OR TNBC OR "HCC2157" OR "HCC1599" OR "HCC1937" OR "HCC1143" OR "MDA-MB-468" OR "HCC38" OR "HCC70" OR "HCC1806" OR "HCC1187" OR "DU4475" OR "BT-549" OR "Hs 578T" OR "MDA-MB-231" OR "MDA-MDB-231" OR "MDA-MB-436" OR "MDA-MB-157" OR "MDA-MB-453" OR "BT-20" OR "HCC1395") AND ("Plasma Gases"[Mesh] OR "Plasma Gases" OR "Gases, Plasma" OR "Cold Plasma" OR "Plasma, Cold" OR "Non-Thermal Atmospheric Pressure Plasma" OR "Non Thermal Atmospheric Pressure Plasma" OR "Thermal Plasma" OR "Plasma, Thermal" OR CAP), using language filters, including articles written in Portuguese, English, Spanish and French.

### 1.2 Web of Science

#### 1.2.1 TNBC and Chemotherapy

("Triple Negative Breast Neoplasm\*" OR "ER-Negative PR-Negative HER2-Negative Breast Neoplasm\*" OR "ER Negative PR Negative HER2 Negative Breast Neoplasm\*" OR "Triple-Negative Breast Cancer\*" OR

"Breast Cancer\*, Triple-Negative" OR "Triple-Negative Breast Neoplasm\*" OR "Breast Neoplasm\*, Triple-Negative" OR "ER-Negative PR-Negative HER2-Negative Breast Cancer\*" OR "ER Negative PR Negative HER2 Negative Breast Cancer\*" OR "Triple Negative Breast Cancer\*" OR TNBC OR "HCC2157" OR "HCC1599" OR "HCC1937" OR "HCC1143" OR "MDA-MB-468" OR "HCC38" OR "HCC70" OR "HCC1806" OR "HCC1187" OR "DU4475" OR "BT-549" OR "Hs 578T" OR "MDA-MB-231" OR "MDA-MDB-231" OR "MDA-MB-436" OR "MDA-MB-157" OR "MDA-MB-453" OR "BT-20" OR "HCC1395") AND ("Doxorubicin\*" OR "Farmiblastina" OR "Ribodoxo" OR "Rubex" OR "Adriamycin" OR "Adriblastin\*" OR "Adriablastin\*" OR "Adrimedac" OR "DOXO-cell" OR "DOXO cell" OR "Doxolem" OR "Doxotec" OR "Myocet" OR "Onkodox" OR "Epirubicin" OR "4'-Epidoxorubicin" OR "4' Epidoxorubicin" OR "4'-Epi-Doxorubicin" OR "4' Epi Doxorubicin" OR "4'-Epi-Adriamycin" OR "4' Epi Adriamycin" OR "4'-Epiadriamycin" OR "4' Epiadriamycin" OR "4'-Epi-DXR" OR "4' Epi DXR" OR "EPI-cell" OR "EPI cell" OR "EPIcell" OR "Epillem" OR "Farmorubicin\*" OR "IMI-28" OR "IMI 28" OR "IMI28" OR "NSC-256942" OR "NSC 256942" OR "NSC256942" OR "Ellence" OR "Pharmorubicin" OR "Cyclophosphamide" OR "Sendoxan" OR "B-518" OR "B 518" OR "B518" OR "Cytophosphan\*" OR "Cytosan" OR "Endoxan" OR "Neosar" OR "NSC-26271" OR "NSC 26271" OR "NSC26271" OR "Procytox" OR "(+,-)-2-(bis(2-Chloroethyl)amino)tetrahydro-2H-1,3,2-oxazaphosphorine 2-Oxide Monohydrate" OR "Cyclophosphane" OR "Paclitaxel" OR "Anzatax" OR "NSC-125973" OR "NSC 125973" OR "NSC125973" OR "Taxol" OR "Paxene" OR "Praxel" OR "7-epi-Taxol" OR "Onxol" OR "Docetaxel" OR "Docetaxol" OR "Taxoltere Metro" OR "RP 56976" OR "RP-56976" OR "RP56976" OR "Taxotere" OR "N-Debenzoyl-N-tert-butoxycarbonyl-10-deacetyltaxol" OR "N Debenzoyl N tert butoxycarbonyl 10 deacetyltaxol" OR "NSC 628503" OR "Carboplat\*" OR "cis-Diammine(cyclobutanedicarboxylato)platinum II" OR "CBDCA" OR "Paraplatin\*" OR "Platinwas" OR "Ribocarbo" OR "Neocarbo" OR "Carbosin" OR "Carbotec" OR "Ercar" OR "JM-8" OR "JM 8" OR "JM8" OR "Nealorin" OR "NSC-241240" OR "NSC 241240" OR "NSC241240" OR "Blastocarb" OR "Capecitabine" OR "N(4)-pentyloxycarbonyl-5'-deoxy-5-fluorocytidine" OR "Xeloda" OR olaparib OR "AZD 2281" OR "AZD2281" OR "AZD-2281" OR "AZD221" OR "Lynparza"), using language filters, including articles written in Portuguese, English and Spanish.

### 1.2.2 TNBC and Cold Plasma

("Triple Negative Breast Neoplasm\*" OR "ER-Negative PR-Negative HER2-Negative Breast Neoplasm\*" OR "ER Negative PR Negative HER2 Negative Breast Neoplasm\*" OR "Triple-Negative Breast Cancer\*" OR "Breast Cancer\*, Triple-Negative" OR "Triple-Negative Breast Neoplasm\*" OR "Breast Neoplasm\*, Triple-Negative" OR "ER-Negative PR-Negative HER2-Negative Breast Cancer\*" OR "ER Negative PR Negative HER2 Negative Breast Cancer\*" OR "Triple Negative Breast Cancer\*" OR TNBC OR "HCC2157" OR "HCC1599" OR "HCC1937" OR "HCC1143" OR "MDA-MB-468" OR "HCC38" OR "HCC70" OR "HCC1806" OR "HCC1187" OR "DU4475" OR "BT-549" OR "Hs 578T" OR "MDA-MB-231" OR "MDA-MDB-231" OR "MDA-MB-436" OR "MDA-MB-157" OR "MDA-MB-453" OR "BT-20" OR "HCC1395") AND ("Plasma Gases" OR "Gases, Plasma" OR "Cold Plasma" OR "Plasma, Cold" OR "Non-Thermal Atmospheric Pressure Plasma" OR "Non Thermal Atmospheric Pressure Plasma" OR "Thermal Plasma" OR "Plasma, Thermal" OR CAP), using language filters, including articles written in Portuguese, English and Spanish.

## 1.3 Embase

### 1.3.1 TNBC and Chemotherapy

('triple negative breast cancer'/exp OR 'triple negative breast neoplasm\*':ti,ab,kw OR 'er-negative pr-negative her2-negative breast neoplasm\*':ti,ab,kw OR 'er negative pr negative her2 negative breast neoplasm\*':ti,ab,kw OR 'triple-negative breast cancer\*':ti,ab,kw OR 'breast cancer, triple-negative':ti,ab,kw OR 'breast cancers, triple-negative':ti,ab,kw OR 'triple-negative breast neoplasm\*':ti,ab,kw OR 'breast neoplasm, triple-negative':ti,ab,kw OR 'breast neoplasms, triple-negative':ti,ab,kw OR 'er-negative pr-negative her2-negative breast cancer\*':ti,ab,kw OR 'er negative pr negative her2 negative breast cancer\*':ti,ab,kw OR 'triple negative breast cancer\*':ti,ab,kw OR tnbc:ti,ab,kw OR hcc2157:ti,ab,kw OR hcc1599:ti,ab,kw OR hcc1937:ti,ab,kw OR 'hcc1143 cell line'/exp OR hcc1143:ti,ab,kw OR 'mda-mb-468 cell line'/exp OR 'mda mb 468':ti,ab,kw OR 'hcc38 cell line'/exp OR hcc38:ti,ab,kw OR 'hcc70 cell line'/exp OR hcc70:ti,ab,kw OR 'hcc1806 cell line'/exp OR hcc1806:ti,ab,kw OR 'hcc1187 cell line'/exp OR hcc1187:ti,ab,kw OR 'du4475 cell line'/exp OR du4475:ti,ab,kw OR 'bt-549 cell line'/exp OR 'bt 549':ti,ab,kw OR 'hs 578t cell line'/exp OR 'hs 578t':ti,ab,kw OR 'mda-mb-231 cell line'/exp OR 'mda mb 231':ti,ab,kw OR 'mda mb 231':ti,ab,kw OR 'mda-mb-436 cell line'/exp OR 'mda mb 436':ti,ab,kw OR 'mda-mb-157 cell line'/exp OR 'mda mb 157':ti,ab,kw OR 'mda-mb-453 cell line'/exp OR 'mda mb 453':ti,ab,kw OR 'bt-20 cell line'/exp OR 'bt 20':ti,ab,kw OR 'hcc1395 cell line'/exp OR hcc1395:ti,ab,kw) AND ('doxorubicin'/exp OR doxorubicin\*':ti,ab,kw OR farmiblastina:ti,ab,kw OR ribodoxo:ti,ab,kw OR rubex:ti,ab,kw OR adriamycin:ti,ab,kw OR adriblastin\*':ti,ab,kw OR adriablastin\*':ti,ab,kw OR adrimedac:ti,ab,kw OR 'doxo cell':ti,ab,kw OR doxolem:ti,ab,kw OR doxotec:ti,ab,kw OR myocet:ti,ab,kw OR onkodox:ti,ab,kw OR

'epirubicin'/exp OR epirubicin:ti,ab,kw OR '4 epidoxorubicin':ti,ab,kw OR '4 epi doxorubicin':ti,ab,kw OR '4 epi adriamycin':ti,ab,kw OR '4 epiadriamycin':ti,ab,kw OR '4 epi dxi':ti,ab,kw OR 'epi cell':ti,ab,kw OR epicell:ti,ab,kw OR epilem:ti,ab,kw OR farmorubicin\*:ti,ab,kw OR 'imi 28':ti,ab,kw OR 'imi28':ti,ab,kw OR 'nsc 256942':ti,ab,kw OR 'nsc256942':ti,ab,kw OR ellence:ti,ab,kw OR pharmorubicin:ti,ab,kw OR 'cyclophosphamide'/exp OR cyclophosphamide:ti,ab,kw OR sendoxan:ti,ab,kw OR 'b 518':ti,ab,kw OR b518:ti,ab,kw OR cytophosphan\*:ti,ab,kw OR cytoxan:ti,ab,kw OR endoxan:ti,ab,kw OR neosar:ti,ab,kw OR 'nsc 26271':ti,ab,kw OR 'nsc26271':ti,ab,kw OR procytox:ti,ab,kw OR (+,-:ti,ab,kw AND -2:ti,ab,kw AND bis:ti,ab,kw AND '2 chloroethyl':ti,ab,kw AND amino:ti,ab,kw AND 'tetrahydro-2h-1,3,2-oxazaphosphorine 2-oxide monohydrate':ti,ab,kw) OR cyclophosphane:ti,ab,kw OR 'paclitaxel'/exp OR paclitaxel:ti,ab,kw OR anzatax:ti,ab,kw OR 'nsc 125973':ti,ab,kw OR 'nsc125973':ti,ab,kw OR taxol:ti,ab,kw OR paxene:ti,ab,kw OR praxel:ti,ab,kw OR '7 epi taxol':ti,ab,kw OR onxol:ti,ab,kw OR 'docetaxel'/exp OR docetaxel:ti,ab,kw OR docetaxol:ti,ab,kw OR 'taxoltere metro':ti,ab,kw OR 'rp 56976':ti,ab,kw OR 'rp56976':ti,ab,kw OR taxotere:ti,ab,kw OR 'n debenzoyl n tert butoxycarbonyl 10 deacetylaxol':ti,ab,kw OR 'nsc 628503':ti,ab,kw OR 'carboplatin'/exp OR carboplat\*:ti,ab,kw OR ('cis diammine':ti,ab,kw AND cyclobutanedicarboxylato:ti,ab,kw AND 'platinum ii':ti,ab,kw) OR cbdca:ti,ab,kw OR paraplatin\*:ti,ab,kw OR platinwas:ti,ab,kw OR ribocarbo:ti,ab,kw OR neocarbo:ti,ab,kw OR carboisin:ti,ab,kw OR carbotec:ti,ab,kw OR ercar:ti,ab,kw OR 'jm 8':ti,ab,kw OR jm8:ti,ab,kw OR nealorin:ti,ab,kw OR 'nsc 241240':ti,ab,kw OR 'nsc241240':ti,ab,kw OR blastocarb:ti,ab,kw OR 'capecitabine'/exp OR capecitabine:ti,ab,kw OR (n:ti,ab,kw AND 4:ti,ab,kw AND 'pentyloxycarbonyl 5 deoxy 5 fluorocytidine':ti,ab,kw) OR xeloda:ti,ab,kw OR 'olaparib'/exp OR olaparib:ti,ab,kw OR 'azd2281':ti,ab,kw OR 'azd 2281':ti,ab,kw OR 'azd221':ti,ab,kw OR lyparza:ti,ab,kw) AND ([english]/lim OR [french]/lim OR [portuguese]/lim OR [spanish]/lim) AND ([article]/lim OR [article in press]/lim OR [data papers]/lim OR [letter]/lim) AND ('ab initio calculation'/de OR 'animal cell'/de OR 'animal cell culture'/de OR 'animal experiment'/de OR 'animal model'/de OR 'animal tissue'/de OR 'antineoplastic protocol'/de OR 'biological model'/de OR 'bone marrow culture'/de OR 'cancer cell culture'/de OR 'cell culture'/de OR 'cell culture technique'/de OR 'chemical model'/de OR 'coculture'/de OR 'comparative effectiveness'/de OR 'comparative study'/de OR 'control group'/de OR 'controlled study'/de OR 'disease model'/de OR 'disease simulation'/de OR 'dosage schedule comparison'/de OR 'drug dosage form comparison'/de OR 'drug dose comparison'/de OR 'ex vivo study'/de OR 'experimental design'/de OR 'experimental model'/de OR 'experimental study'/de OR 'exploratory research'/de OR 'fibroblast culture'/de OR 'genetic model'/de OR 'heart cell culture'/de OR 'human'/de OR 'human cell'/de OR 'human cell culture'/de OR 'human experiment'/de OR 'human tissue'/de OR 'hybridoma cell culture'/de OR 'in vitro study'/de OR 'in vivo study'/de OR 'leukocyte culture'/de OR 'lymphocyte culture'/de OR 'mammal cell'/de OR 'mixed cell culture'/de OR 'model'/de OR 'molecular model'/de OR 'monolayer culture'/de OR 'mouse model'/de OR 'murine model'/de OR 'nerve cell culture'/de OR 'nonhuman'/de OR 'normal human'/de OR 'pilot study'/de OR 'preclinical study'/de OR 'primary cell culture'/de OR 'prospective study'/de OR 'suspension cell culture'/de OR 'three dimensional cell culture'/de OR 'tissue culture'/de OR 'tumor cell culture'/de OR 'tumor model'/de OR 'tumor spheroid'/de OR 'two dimensional cell culture'/de OR 'validation study'/de)

### 1.3.2 TNBC and Cold Plasma

((('triple negative breast cancer'/exp OR 'triple negative breast neoplasm\*:ti,ab,kw OR 'er negative pr negative her2-negative breast neoplasm\*:ti,ab,kw OR 'triple-negative breast cancer\*:ti,ab,kw OR 'breast cancer, triple-negative':ti,ab,kw OR 'breast cancers, triplenegative':ti,ab,kw OR 'triple-negative breast neoplasm\*:ti,ab,kw OR 'breast neoplasm, triple-negative':ti,ab,kw OR 'breast neoplasms, triple-negative':ti,ab,kw OR 'er-negative pr negative her2-negative breast cancer\*:ti,ab,kw OR 'er negative pr negative her2 negative breast cancer\*:ti,ab,kw OR 'triple negative breast cancer\*:ti,ab,kw OR tnbc:ti,ab,kw OR hcc2157:ti,ab,kw OR hcc1599:ti,ab,kw OR hcc1937:ti,ab,kw OR 'hcc1143 cell line'/exp OR hcc1143:ti,ab,kw OR 'mda-mb-468 cell line'/exp OR 'mda mb 468':ti,ab,kw OR 'hcc38 cell line'/exp OR hcc38:ti,ab,kw OR 'hcc70 cell line'/exp OR hcc70:ti,ab,kw OR 'hcc1806 cell line'/exp OR hcc1806:ti,ab,kw OR 'hcc1187 cell line'/exp OR hcc1187:ti,ab,kw OR 'du4475 cell line'/exp OR du4475:ti,ab,kw OR 'bt-549 cell line'/exp OR 'bt 549':ti,ab,kw OR 'hs 578t cell line'/exp OR 'hs 578t':ti,ab,kw OR 'mda-mb-231 cell line'/exp OR 'mda mb 231':ti,ab,kw OR 'mda mdb 231':ti,ab,kw OR 'mda-mb-436 cell line'/exp OR 'mda mb 436':ti,ab,kw OR 'mda-mb-157 cell line'/exp OR 'mda mb 157':ti,ab,kw OR 'mda-mb-453 cell line'/exp OR 'mda mb 453':ti,ab,kw OR 'bt- 20 cell line'/exp OR 'bt 20':ti,ab,kw OR 'hcc1395 cell line'/exp OR hcc1395:ti,ab,kw) AND ('plasma gas'/exp OR 'plasma gas\*:ti,ab,kw OR 'gases, plasma':ti,ab,kw OR 'cold plasma'/exp OR 'cold plasma':ti,ab,kw OR 'plasma, cold':ti,ab,kw OR 'non thermal atmospheric pressure plasma'/exp OR 'non-thermal atmospheric pressure plasma':ti,ab,kw OR 'non thermal atmospheric pressure plasma':ti,ab,kw OR 'thermal plasma':ti,ab,kw OR 'plasma, thermal':ti,ab,kw OR cap:ti,ab,kw) AND ([english]/lim OR [french]/lim OR [portuguese]/lim OR [spanish]/lim)) AND ('article'/it OR 'note'/it) AND ('animal cell'/de OR 'animal experiment'/de OR 'animal model'/de OR 'animal tissue'/de OR 'cancer cell culture'/de OR 'cancer model'/de OR 'cell culture'/de OR 'comparative study'/de OR 'controlled study'/de OR 'drug dosage form

comparison'/de OR 'human'/de OR 'human cell'/de OR 'human tissue'/de OR 'in vitro study'/de OR 'in vivo study'/de OR 'mouse model'/de OR 'nonhuman'/de OR 'pilot study'/de OR 'prospective study'/de OR 'tumor spheroid'/de OR 'two dimensional cell culture'/de)

## 1.4 Cochrane Library

### 1.4.1 TNBC and Chemotherapy

|     |                                                                                                                                                                                                                                          |      |
|-----|------------------------------------------------------------------------------------------------------------------------------------------------------------------------------------------------------------------------------------------|------|
| #1  | MeSH descriptor: [Triple Negative Breast Neoplasms] explode all trees                                                                                                                                                                    | 431  |
| #2  | "Triple Negative Breast Neoplasm"                                                                                                                                                                                                        | 3    |
| #3  | "Triple Negative Breast Neoplasms"                                                                                                                                                                                                       | 437  |
| #4  | "ER-Negative PR-Negative HER2-Negative Breast Neoplasm"                                                                                                                                                                                  | 0    |
| #5  | "ER-Negative PR-Negative HER2-Negative Breast Neoplasms"                                                                                                                                                                                 | 0    |
| #6  | "Triple-Negative Breast Cancer"                                                                                                                                                                                                          | 1565 |
| #7  | "Triple-Negative Breast Cancers"                                                                                                                                                                                                         | 56   |
| #8  | "Breast Cancer, Triple-Negative"                                                                                                                                                                                                         | 17   |
| #9  | "Breast Cancers, Triple-Negative"                                                                                                                                                                                                        | 1    |
| #10 | "Triple-Negative Breast Neoplasm"                                                                                                                                                                                                        | 3    |
| #11 | "Triple-Negative Breast Neoplasms"                                                                                                                                                                                                       | 437  |
| #12 | "Breast Neoplasm, Triple-Negative"                                                                                                                                                                                                       | 0    |
| #13 | "Breast Neoplasms, Triple-Negative"                                                                                                                                                                                                      | 24   |
| #14 | "ER-Negative PR-Negative HER2-Negative Breast Cancer"                                                                                                                                                                                    | 0    |
| #15 | "ER-Negative PR-Negative HER2-Negative Breast Cancers"                                                                                                                                                                                   | 0    |
| #16 | TNBC                                                                                                                                                                                                                                     | 1129 |
| #17 | HCC2157                                                                                                                                                                                                                                  | 0    |
| #18 | HCC1599                                                                                                                                                                                                                                  | 0    |
| #19 | HCC1937                                                                                                                                                                                                                                  | 0    |
| #20 | HCC1143                                                                                                                                                                                                                                  | 0    |
| #21 | MDA-MB-468                                                                                                                                                                                                                               | 7    |
| #22 | HCC38                                                                                                                                                                                                                                    | 2    |
| #23 | HCC70                                                                                                                                                                                                                                    | 1    |
| #24 | HCC1806                                                                                                                                                                                                                                  | 0    |
| #25 | HCC1187                                                                                                                                                                                                                                  | 1    |
| #26 | DU4475                                                                                                                                                                                                                                   | 0    |
| #27 | BT-549                                                                                                                                                                                                                                   | 3    |
| #28 | "Hs 578T"                                                                                                                                                                                                                                | 0    |
| #29 | MDA-MB-231                                                                                                                                                                                                                               | 35   |
| #30 | MDA-MDB-231                                                                                                                                                                                                                              | 0    |
| #31 | MDA-MB-436                                                                                                                                                                                                                               | 3    |
| #32 | MDA-MB-157                                                                                                                                                                                                                               | 1    |
| #33 | MDA-MB-453                                                                                                                                                                                                                               | 7    |
| #34 | BT-20                                                                                                                                                                                                                                    | 9    |
| #35 | HCC1395                                                                                                                                                                                                                                  | 0    |
| #36 | #1 OR #2 OR #3 OR #4 OR #5 OR #6 OR #7 OR #8 OR #9 OR #10 OR #11 OR #12 OR #13 OR #14 OR #15 OR #16 OR #17 OR #18 OR #19 OR #20 OR #21 OR #22 OR #23 OR #24 OR #25 OR #26 OR #27 OR #28 OR #29 OR #30 OR #31 OR #32 OR #33 OR #34 OR #35 | 1722 |
| #37 | MeSH descriptor: [Doxorubicin] explode all trees                                                                                                                                                                                         | 5444 |
| #38 | Doxorubicin*                                                                                                                                                                                                                             | 8635 |
| #39 | Farmiblastina                                                                                                                                                                                                                            | 5    |
| #40 | Ribodoxo                                                                                                                                                                                                                                 | 7    |
| #41 | Rubex                                                                                                                                                                                                                                    | 7    |
| #42 | Adriamycin                                                                                                                                                                                                                               | 1941 |
| #43 | Adriblastin*                                                                                                                                                                                                                             | 32   |
| #44 | Adriablastin*                                                                                                                                                                                                                            | 22   |
| #45 | Adrimedac                                                                                                                                                                                                                                | 5    |
| #46 | DOXO-cell                                                                                                                                                                                                                                | 8    |
| #47 | Doxolem                                                                                                                                                                                                                                  | 6    |
| #48 | Doxotec                                                                                                                                                                                                                                  | 4    |
| #49 | Myocet                                                                                                                                                                                                                                   | 80   |
| #50 | Onkodox                                                                                                                                                                                                                                  | 5    |
| #51 | MeSH descriptor: [Epirubicin] explode all trees                                                                                                                                                                                          | 1343 |
| #52 | Epirubicin                                                                                                                                                                                                                               | 3452 |
| #53 | "4'-Epidoxorubicin"                                                                                                                                                                                                                      | 48   |
| #54 | "4'-Epi-Doxorubicin"                                                                                                                                                                                                                     | 23   |
| #55 | "4'-Epi-Adriamycin"                                                                                                                                                                                                                      | 13   |
| #56 | "4'-Epiadriamycin"                                                                                                                                                                                                                       | 17   |
| #57 | "4'-Epi-DXR"                                                                                                                                                                                                                             | 8    |

|      |                                                                                             |       |      |
|------|---------------------------------------------------------------------------------------------|-------|------|
| #58  | EPI-cell                                                                                    | 5     |      |
| #59  | EPIcell                                                                                     | 5     |      |
| #60  | Epilem                                                                                      | 3     |      |
| #61  | Farmorubicin*                                                                               | 46    |      |
| #62  | IMI-28                                                                                      | 12    |      |
| #63  | IMI28                                                                                       | 10    |      |
| #64  | NSC-256942                                                                                  | 9     |      |
| #65  | NSC256942                                                                                   | 8     |      |
| #66  | Ellence                                                                                     | 10    |      |
| #67  | Pharmorubicin                                                                               | 12    |      |
| #68  | MeSH descriptor: [Cyclophosphamide] explode all trees                                       |       | 6127 |
| #69  | Cyclophosphamide                                                                            | 13392 |      |
| #70  | Sendoxan                                                                                    | 19    |      |
| #71  | B-518                                                                                       | 8     |      |
| #72  | B518                                                                                        | 4     |      |
| #73  | Cytophosphan*                                                                               | 7     |      |
| #74  | Cytosan 206                                                                                 |       |      |
| #75  | Endoxan                                                                                     | 118   |      |
| #76  | Neosar                                                                                      | 16    |      |
| #77  | NSC-26271                                                                                   | 24    |      |
| #78  | NSC26271                                                                                    | 3     |      |
| #79  | Procytox7                                                                                   |       |      |
| #80  | "(+,-)-2-(bis(2-Chloroethyl)amino)tetrahydro-2H-1,3,2-oxazaphosphorine 2-Oxide Monohydrate" |       |      |
|      | 0                                                                                           |       |      |
| #81  | Cyclophosphane                                                                              | 8     |      |
| #82  | MeSH descriptor: [Paclitaxel] explode all trees                                             |       | 4445 |
| #83  | Paclitaxel                                                                                  | 12029 |      |
| #84  | Anzatax                                                                                     | 10    |      |
| #85  | NSC-125973                                                                                  | 9     |      |
| #86  | NSC125973                                                                                   | 2     |      |
| #87  | Taxol                                                                                       | 569   |      |
| #88  | Paxene                                                                                      | 8     |      |
| #89  | Praxel                                                                                      | 6     |      |
| #90  | "7-epi-Taxol"                                                                               | 2     |      |
| #91  | Onxol                                                                                       | 5     |      |
| #92  | MeSH descriptor: [Docetaxel] explode all trees                                              |       | 2607 |
| #93  | Docetaxel                                                                                   | 8148  |      |
| #94  | Docetaxol                                                                                   | 19    |      |
| #95  | "Taxoltere Metro"                                                                           | 0     |      |
| #96  | RP-56976                                                                                    | 7     |      |
| #97  | RP56976                                                                                     | 2     |      |
| #98  | Taxotere                                                                                    | 532   |      |
| #99  | "N-Debenzoyl-N-tert-butoxycarbonyl-10-deacetylaxol"                                         |       | 0    |
| #100 | "NSC 628503"                                                                                | 5     |      |
| #101 | MeSH descriptor: [Carboplatin] explode all trees                                            |       | 2918 |
| #102 | Carboplat*                                                                                  | 8410  |      |
| #103 | "cis-Diammine(cyclobutanedicarboxylato)platinum II"                                         | 6     |      |
| #104 | CBDCA                                                                                       | 265   |      |
| #105 | Paraplatin*                                                                                 | 62    |      |
| #106 | Platinwas                                                                                   | 10    |      |
| #107 | Ribocarbo                                                                                   | 13    |      |
| #108 | Neocarbo                                                                                    | 10    |      |
| #109 | Carbosin                                                                                    | 11    |      |
| #110 | Carbotec                                                                                    | 10    |      |
| #111 | Ercar                                                                                       | 10    |      |
| #112 | JM-8                                                                                        | 15    |      |
| #113 | JM8                                                                                         | 19    |      |
| #114 | Nealorin                                                                                    | 10    |      |
| #115 | NSC-241240                                                                                  | 13    |      |
| #116 | NSC241240                                                                                   | 8     |      |
| #117 | Blastocarb                                                                                  | 10    |      |
| #118 | MeSH descriptor: [Capecitabine] explode all trees                                           |       | 1564 |
| #119 | Capecitabine                                                                                | 4593  |      |
| #120 | "N(4)-pentyloxycarbonyl-5'-deoxy-5-fluorocytidine"                                          |       | 0    |
| #121 | Xeloda                                                                                      | 370   |      |
| #122 | olaparib                                                                                    | 821   |      |
| #123 | AZD-2281                                                                                    | 6     |      |

#124 AZD2281 75  
 #125 AZD221 0  
 #126 Lynparza 58  
 #127 #37 OR #38 OR #39 OR #40 OR #41 OR #42 OR #43 OR #44 OR #45 OR #46 OR #47 OR #48  
 OR #49 OR #50 OR #51 OR #52 OR #53 OR #54 OR #55 OR #56 OR #57 OR #58 OR #59 OR #60 OR  
 #61 OR #62 OR #63 OR #64 OR #65 OR #66 OR #67 OR #68 OR #69 OR #70 OR #71 OR #72 OR #73  
 OR #74 OR #75 OR #76 OR #77 OR #78 OR #79 OR #80 OR #81 OR #82 OR #83 OR #84 OR #85 OR  
 #86 OR #87 OR #88 OR #89 OR #90 OR #91 OR #92 OR #93 OR #94 OR #95 OR #96 OR #97 OR #98  
 OR #99 OR #100 OR #101 OR #102 OR #103 OR #104 OR #105 OR #106 OR #107 OR #108 OR #109  
 OR #110 OR #111 OR #112 OR #113 OR #114 OR #115 OR #116 OR #117 OR #118 OR #119 OR #120  
 OR #121 OR #122 OR #123 OR #124 OR #125 OR #126 42179  
 #128 #36 AND #127 1121

#### 1.4.2 TNBC and Cold Plasma

#1 MeSH descriptor: [Triple Negative Breast Neoplasms] explode all trees 431  
 #2 "Triple Negative Breast Neoplasm" 3  
 #3 "Triple Negative Breast Neoplasms" 437  
 #4 "ER-Negative PR-Negative HER2-Negative Breast Neoplasm" 0  
 #5 "ER-Negative PR-Negative HER2-Negative Breast Neoplasms" 0  
 #6 "Triple-Negative Breast Cancer" 1565  
 #7 "Triple-Negative Breast Cancers" 56  
 #8 "Breast Cancer, Triple-Negative" 17  
 #9 "Breast Cancers, Triple-Negative" 1  
 #10 "Triple-Negative Breast Neoplasm" 3  
 #11 "Triple-Negative Breast Neoplasms" 437  
 #12 "Breast Neoplasm, Triple-Negative" 0  
 #13 "Breast Neoplasms, Triple-Negative" 24  
 #14 "ER-Negative PR-Negative HER2-Negative Breast Cancer" 0  
 #15 "ER-Negative PR-Negative HER2-Negative Breast Cancers" 0  
 #16 TNBC 1129  
 #17 HCC2157 0  
 #18 HCC1599 0  
 #19 HCC1937 0  
 #20 HCC1143 0  
 #21 MDA-MB-468 7  
 #22 HCC38 2  
 #23 HCC70 1  
 #24 HCC1806 0  
 #25 HCC1187 1  
 #26 DU4475 0  
 #27 BT-549 3  
 #28 "Hs 578T" 0  
 #29 MDA-MB-231 35  
 #30 MDA-MDB-231 0  
 #31 MDA-MB-436 3  
 #32 MDA-MB-157 1  
 #33 MDA-MB-453 7  
 #34 BT-20 9  
 #35 HCC1395 0  
 #36 #1 OR #2 OR #3 OR #4 OR #5 OR #6 OR #7 OR #8 OR #9 OR #10 OR #11 OR #12 OR #13 OR  
 #14 OR #15 OR #16 OR #17 OR #18 OR #19 OR #20 OR #21 OR #22 OR #23 OR #24 OR #25 OR #26  
 OR #27 OR #28 OR #29 OR #30 OR #31 OR #32 OR #33 OR #34 OR #35 1722  
 #37 MeSH descriptor: [Plasma Gases] explode all trees 45  
 #38 "Plasma Gases" 46  
 #39 "Gases, Plasma" 11  
 #40 "Cold Plasma" 23  
 #41 "Plasma, Cold" 2  
 #42 "Non-Thermal Atmospheric Pressure Plasma" 5  
 #43 "Non Thermal Atmospheric Pressure Plasma" 5  
 #44 "Thermal Plasma" 6  
 #45 "Plasma, Thermal" 0  
 #46 CAP 5857  
 #47 #38 OR #39 OR #40 OR #41 OR #42 OR #43 OR #44 OR #45 OR #46 OR #47 5923  
 #48 #36 AND #47

## 2. Results

**Table S1** – Quantitative summary of cell viability/proliferation reduction outcomes.

| ARTICLE<br>(Year)           | CELL LINE  | STUDY            | TREATMENT                     | DOSE                    | PERIOD OF<br>INCUBATION | MEAN (reduction) ± SD (if<br>applicable) |
|-----------------------------|------------|------------------|-------------------------------|-------------------------|-------------------------|------------------------------------------|
| Xiang et al (2018)          | MDA-MB-231 | In vivo          | PAM treatment                 | 5 min                   | 24 h                    | 19.4%                                    |
| Arun et al (2016)           | MDA-MB-231 | MTT assay        | Doxorubicin                   | 1 µM                    | 12h                     | 1,0%                                     |
|                             |            |                  |                               | 6 µM                    |                         | 20,0%                                    |
|                             |            |                  |                               | 1 µM                    | 24h                     | 35,0%                                    |
|                             |            |                  |                               | 2 µM                    |                         | 35,0%                                    |
| Chen et al (2017)           | MDA-MB-231 | MTT assay        | CAP treatment                 | Air                     | 24h                     | 27.4%                                    |
|                             |            |                  |                               | Helium                  | 24h                     | 14.7%                                    |
|                             |            |                  |                               | Air                     | 48h                     | 73.1%                                    |
|                             |            |                  |                               | Helium                  | 48h                     | 22.8%                                    |
|                             |            |                  |                               | Nitrogen                | 48h                     | 14.1%                                    |
|                             |            |                  |                               | Water                   | 48h                     | 13.5%                                    |
| Mihai et al (2022)          | MDA-MB-231 | MTT assay        | Paclitaxel                    | 0.001µM                 | 24h                     | 105,0%                                   |
|                             |            |                  |                               | 0.01 µM                 |                         | 63.05%                                   |
|                             |            |                  |                               | 0.001µM                 | 48h                     | 92.79%                                   |
|                             |            |                  |                               | 0.01 µM                 |                         | 28.31%                                   |
|                             |            |                  | PAM treatment                 | 30 and 60s              | 48h                     | 75,0%                                    |
|                             |            |                  | Paclitaxel + PAM<br>treatment | Several<br>combinations | 24h                     | Between 66.23% and 63.72%                |
|                             |            |                  |                               |                         | 48h                     | Between 81.20% and 80.05%                |
|                             |            | Area (spheroids) | PAM treatment                 | 15 s                    | 24h                     | 23.83% vs control and 20.95% vs PTX      |
| Subramanian et al<br>(2020) | MDA-MB-231 | MTT assay        | PAM treatment                 | 6 min                   | 24h                     | 19,0%                                    |
|                             |            |                  |                               | 12 min                  |                         | 45,0%                                    |
|                             |            |                  |                               | 18 min                  |                         | 76,0%                                    |
|                             |            |                  |                               | Acid                    |                         | 7,0%                                     |

|                                 |            |           |              |         |     |       |
|---------------------------------|------------|-----------|--------------|---------|-----|-------|
|                                 |            |           |              | 60 µL   |     | 3,0%  |
|                                 |            |           |              | 80 µL   |     | 2,0%  |
|                                 |            |           |              | 100 µL  |     | 3,0%  |
|                                 |            |           |              | 150 µL  |     | 34,0% |
|                                 |            |           |              | 200 µL  |     | 80,0% |
|                                 |            |           |              | 6 min   |     | 19,0% |
|                                 |            |           |              | 12 min  |     | 37,0% |
|                                 |            |           |              | 12 min  |     | 21,0% |
|                                 |            |           |              | 18 min  |     | 74,0% |
|                                 |            |           |              | 18 min  |     | 61,0% |
| Chuang et al (2012)             | MDA-MB-231 | MTT assay | Olaparib     | >100 µM | 72h | 50,0% |
|                                 | MDA-MB-468 |           |              | 18 µM   |     |       |
|                                 | Cal5       |           |              | 9.5 µM  |     |       |
| Izbicka et al (2005)            | MDA-MB-231 | MTT assay | Docetaxel    | 0.1 nM  | 72h | 25,0% |
|                                 |            |           |              | 0.5 nM  |     | 50,0% |
|                                 |            |           |              | 5 nM    |     | 75,0% |
|                                 |            |           | Paclitaxel   | 0.1nM   |     | 25,0% |
|                                 |            |           |              | 1 nM    |     | 50,0% |
|                                 |            |           |              | 5 nM    |     | 75,0% |
| Kim et al (2003)                | MDA-MB-231 | MTT assay | Doxorubicin  | 0.3 µM  | 48h | 50,0% |
|                                 |            |           | Paclitaxel   | 0.03 µM |     |       |
| Moschetta-Pinheiro et al (2022) | MDA-MB-468 | MTT assay | Carboplatin  | 10 µM   | 24h | 50,0% |
| Parrella et al (2014)           | MDA-MB-231 | MTT assay | Doxorubicin  | 19 µM   | 24h | 50,0% |
|                                 |            |           |              | 4 µM    | 72h |       |
|                                 |            |           | Capecitabine | 5150 µM | 24h |       |
|                                 |            |           |              | 2790 µM | 72h |       |
| Pilco-Ferreto & Calaf (2016)    | MDA-MB-231 | MTT assay | Doxorubicin  | 1 µM    | 48h | 50,0% |



|                            |                                            |                  |             |              |      |               |
|----------------------------|--------------------------------------------|------------------|-------------|--------------|------|---------------|
| Taherian et al (2012)      | MDA-MB-231                                 | MTT assay        | Doxorubicin | 887.75 μM    | 48h  | 50,0%         |
|                            |                                            |                  | Docetaxel   | 634.58 μM    |      |               |
| Tassone et al (2003)       | MDA-MB-231                                 | MTT assay        | Doxorubicin | 5-10 μM      | 48h  | 50,0%         |
|                            |                                            |                  | Paclitaxel  | 0.01-0.02 μM |      |               |
|                            | HCC1937                                    |                  | Doxorubicin | 45-50 μM     |      |               |
|                            |                                            |                  | Paclitaxel  | 2 μM         |      |               |
| Yaourtis et al (2023)      | MDA-MB-231 (Spindle and stellar phenotype) | MTT assay        | Doxorubicin | 0.31±0.05μM  | 72h  | 50,0%         |
|                            |                                            |                  |             | 0.25±0.05μM  |      | 50,0%         |
| Frankfurt & Krishan (2003) | MDA-MB-468                                 | MTT assay        | Doxorubicin | 0.05 μM      | 48h  | 50,0%         |
|                            |                                            |                  | Paclitaxel  | 0.01 μM      |      |               |
|                            |                                            | SRB assay        | Doxorubicin | 0.1 μM       |      |               |
|                            |                                            |                  | Paclitaxel  | 0.01 μM      |      |               |
| Blois et al (2011)         | MDA-MB-231                                 | SRB assay        | Paclitaxel  | 0.07 nM      | 48h  | 50,0%         |
| Norris et al (2013)        | HCC-1937                                   | SRB assay        | Olaparib    | 100 nM       | 120h | 50,0%         |
| Oncul et al (2017)         | MDA-MB-231                                 | SRB assay        | Doxorubicin | 50 nM        | 48h  | 111.64±14.59% |
|                            |                                            |                  |             | 100 nM       |      | 95.25±3.14%   |
|                            |                                            |                  |             | 200 nM       |      | 92.68±5.80%   |
|                            |                                            |                  |             | 400 nM       |      | 89.02±6.32%   |
|                            |                                            |                  |             | 800 nM       |      | 75.94±4.85%   |
|                            |                                            |                  |             | 1000 nM      |      | 84.04±9.74%   |
|                            |                                            |                  |             | 1500 nM      |      | 82.32±8.71%   |
|                            |                                            |                  |             | 2000 nM      |      | 76.94±4.37%   |
|                            |                                            |                  |             | 3000 nM      |      | 74.597±4.64%  |
|                            |                                            |                  |             | 4000 nM      |      | 68.90±4.01%   |
|                            |                                            |                  |             | 8000 nM      |      | 41.11±4.73%   |
| Chuang et al (2012)        | MDA-MB-231                                 | Clonogenic assay | Olaparib    | 4.5 μM       | 72h  | 50,0%         |
|                            | MDA-MB-468                                 |                  |             | 0.2 μM       |      |               |

|                               |            |                   |               |             |         |                                       |
|-------------------------------|------------|-------------------|---------------|-------------|---------|---------------------------------------|
|                               | Cal51      |                   |               | 0.4 $\mu$ M |         |                                       |
| Hernández-Vargas et al (2007) | MDA-MB-231 | Clonogenic assay  | Docetaxel     | 2 nM        | 24h     | 75,0%                                 |
| Lafontaine et al (2020)       | BT549      | Clonogenic assay  | CAP treatment | 7.8 s       | 6 days  | 50,0%                                 |
|                               | Hs578T     |                   |               | 18.4 s      |         |                                       |
|                               | MDA-MB-157 |                   |               | 4.6 s       |         |                                       |
|                               | MDA-MB-231 |                   |               | 1.6 s       |         |                                       |
|                               | MDA-MB-468 |                   |               | 6 s         |         |                                       |
| Morse et al (2005)            | MDA-MB-231 | Clonogenic assay  | Docetaxel     | 10nmol/L    | 24h     | 50,0%                                 |
|                               |            |                   |               | 10nmol/L    | 48h     |                                       |
|                               |            |                   |               | 10nmol/L    | 72h     |                                       |
| Almeida-Ferreira et al (2022) | HCC1806    | Annexin V/PI (FC) | CAP treatment | 60 s        | 24h     | 80.5 $\pm$ 1.59% to 64.67 $\pm$ 2.16% |
|                               |            |                   |               | 120s        | 24h     | 80.5 $\pm$ 1.59% to 65.00 $\pm$ 3.39% |
| Morse et al (2005)            | MDA-MB-231 | Annexin V/PI (FC) | Docetaxel     | 10nmol/L    | 24h     | 13.4 $\pm$ 25.6%                      |
|                               |            |                   |               | 100nmol/L   |         | 51.5 $\pm$ 31.6%                      |
|                               |            |                   |               | 10nmol/L    | 48h     | 21.8 $\pm$ 2.9%                       |
|                               |            |                   |               | 100nmol/L   |         | 62.5 $\pm$ 3.1%                       |
|                               |            |                   |               | 10nmol/L    | 72h     | 12.9 $\pm$ 2.7%                       |
|                               |            |                   |               | 100nmol/L   |         | 68.4 $\pm$ 2.8%                       |
| Stope et al (2020)            | MDA-MB-231 | Annexin V/PI (FC) | CAP treatment | 60s         | 4h-120h | 4.5%                                  |
|                               |            |                   | PAM treatment | 60s         | 4h-120h | 3.0%                                  |
| Wang et al (2021)             | MDA-MB-231 | Annexin V/PI (FC) | PAM treatment | 10 min      | 24h     | 83.98 $\pm$ 5.02%                     |
|                               | MDA-MB-468 |                   | PAM treatment | 10 min      | 24h     | 59.71 $\pm$ 6%                        |
| Xiang et al (2018)            | MDA-MB-231 | Annexin V/PI (FC) | PAM treatment | 5 min       | 24h     | 41,0%                                 |
|                               | MDA-MB-468 |                   | PAM treatment | 5 min       | 24h     | 46,0%                                 |
| Merrill et al (2019)          | MUM51      | Annexin V/PI (FC) | Paclitaxel    | 110 nM      | 72h     | 50,0%                                 |
|                               | BT20       |                   |               | 159 nM      |         |                                       |
|                               | BT549      |                   |               | 110 nM      |         |                                       |
|                               | CAL148     |                   |               | 4 nM        |         |                                       |

|            |           |         |
|------------|-----------|---------|
| CAL51      |           | 310 nM  |
| DU4475     |           | 19 nM   |
| HCC1806    |           | 77 nM   |
| HCC1937    |           | 130 nM  |
| HCC38      |           | 1700 nM |
| HCC70      |           | 3 nM    |
| Hs578T     |           | 150 nM  |
| MDA-MB-157 |           | 90 nM   |
| MDA-MB-231 |           | 200 nM  |
| MDA-MB-436 |           | 110 nM  |
| MDA-MB-453 |           | 2 nM    |
| MDA-MB-468 |           | 89 nM   |
| MFM223     |           | 4 nM    |
| SUM102     |           | 9 nM    |
| SUM149     |           | 13 nM   |
| SUM159     |           | 2 nM    |
| SUM185     |           | 10 nM   |
| SUM52      |           | 3 nM    |
| MUM51      |           | 2 nM    |
| BT20       |           | 2 nM    |
| BT549      |           | 1 nM    |
| CAL148     |           | 2 nM    |
| CAL51      | Docetaxel | 4 nM    |
| DU4475     |           | 5 nM    |
| HCC1806    |           | 4 nM    |
| HCC1937    |           | 1 nM    |
| HCC38      |           | 1 nM    |
| HCC70      |           | 1 nM    |

|                        |            |             |                            |                  |        |       |
|------------------------|------------|-------------|----------------------------|------------------|--------|-------|
|                        | Hs578T     |             |                            | 1 nM             |        |       |
|                        | MDA-MB-157 |             |                            | 1 nM             |        |       |
|                        | MDA-MB-231 |             |                            | 2 nM             |        |       |
|                        | MDA-MB-436 |             |                            | 1 nM             |        |       |
|                        | MDA-MB-453 |             |                            | 1 nM             |        |       |
|                        | MDA-MB-468 |             |                            | 1 nM             |        |       |
|                        | MFM223     |             |                            | 740 nM           |        |       |
|                        | SUM102     |             |                            | 1 nM             |        |       |
|                        | SUM149     |             |                            | 5 nM             |        |       |
|                        | SUM159     |             |                            | 140 nM           |        |       |
|                        | SUM185     |             |                            | 2 nM             |        |       |
|                        | SUM52      |             |                            | 2 nM             |        |       |
| Koechli et al (1993)   | BT-20      | ATP assay   | Paclitaxel                 | 0.00163 PPCs     | 90 min | 50,0% |
|                        |            |             | Doxorubicin                | 0.319 PPCs       |        |       |
|                        |            |             | Paclitaxel and Doxorubicin | 0.2277 PPCs      |        |       |
| Liu et al (2017)       | MDA-MB-231 | TrypanBlue  | CAP tretament              | 120 s            | 48h    | > 50% |
|                        | MDA-MB-453 |             | CAP tretament              | 120 s            | 48h    | > 20% |
| McCloskey et al (1996) | MDA-MB-468 | TrypanBlue  | Paclitaxel                 | 17 nM            | 3h     | 50,0% |
|                        |            |             | Paclitaxel                 | 2.6 nM           | 24h    |       |
|                        |            |             | Paclitaxel                 | 1.8 nM           | 120h   |       |
| Kibria et al (2014)    | MDA-MB-231 | WST-8 assay | Doxorubicin                | 25.72±20.27µg/mL | 8h     | 50,0% |

**Table S2** – Qualitative detailed of SYRCLE tool questions regarding *in vivo* studies.

| STUDY               | QUESTIONS |         |         |         |         |         |         |     |     |     |
|---------------------|-----------|---------|---------|---------|---------|---------|---------|-----|-----|-----|
|                     | 1         | 2       | 3       | 4       | 5       | 6       | 7       | 8   | 9   | 10  |
| Man et al (2002)    | Unclear   | Unclear | Unclear | Unclear | Unclear | No      | Unclear | Yes | Yes | Yes |
| Munõz et al (2019)  | Unclear   | Unclear | Unclear | Unclear | Unclear | Unclear | Unclear | Yes | Yes | Yes |
| Shaked et al (2016) | Unclear   | Unclear | Unclear | Unclear | Unclear | Unclear | Unclear | Yes | Yes | Yes |
| Xiang et al (2018)  | Unclear   | Unclear | Unclear | Unclear | Unclear | Unclear | Unclear | Yes | Yes | Yes |
| Zhou et al (2020)   | Unclear   | Unclear | Unclear | Unclear | Unclear | Unclear | Unclear | Yes | Yes | Yes |

**Table S3** – Quantitative detailed of ToxRTool tool questions regarding *in vitro* studies.

| STUDY                         | QUESTIONS |   |   |   |   |   |   |   |   |    |    |    |    |    |    |    |    |    |
|-------------------------------|-----------|---|---|---|---|---|---|---|---|----|----|----|----|----|----|----|----|----|
|                               | 1         | 2 | 3 | 4 | 5 | 6 | 7 | 8 | 9 | 10 | 11 | 12 | 13 | 14 | 15 | 16 | 17 | 18 |
| Adachi et al (2018)           | 1         | 0 | 1 | 0 | 1 | 1 | 1 | 0 | 1 | 0  | 1  | 1  | 1  | 1  | 0  | 1  | 1  | 1  |
| Almeida-Ferreira et al (2022) | 1         | 0 | 1 | 1 | 1 | 1 | 1 | 0 | 1 | 0  | 1  | 1  | 1  | 1  | 1  | 1  | 1  | 1  |
| Arun et al (2016)             | 1         | 0 | 1 | 1 | 1 | 1 | 1 | 0 | 1 | 0  | 1  | 1  | 1  | 1  | 0  | 1  | 1  | 1  |
| Bernhardt et al (1992)        | 1         | 0 | 1 | 1 | 1 | 1 | 1 | 0 | 1 | 0  | 1  | 1  | 0  | 0  | 0  | 0  | 0  | 0  |
| Blois et al (2011)            | 1         | 0 | 1 | 1 | 1 | 1 | 0 | 0 | 1 | 0  | 1  | 1  | 1  | 0  | 1  | 0  | 1  | 1  |

|                                                                                                                                           |   |   |   |   |   |   |   |   |   |   |   |   |   |   |   |   |   |   |
|-------------------------------------------------------------------------------------------------------------------------------------------|---|---|---|---|---|---|---|---|---|---|---|---|---|---|---|---|---|---|
| Chen et al (2018)<br><i>Micro-sized cold atmospheric plasma source for brain and breast cancer treatment</i>                              | 1 | 0 | 1 | 1 | 1 | 1 | 1 | 0 | 1 | 0 | 1 | 1 | 1 | 1 | 0 | 1 | 1 | 1 |
| Chen et al (2017)<br><i>Cold atmospheric plasma discharged in water and its potential use in cancer therapy</i>                           | 1 | 0 | 1 | 1 | 1 | 1 | 1 | 0 | 1 | 0 | 1 | 1 | 0 | 1 | 0 | 0 | 1 | 0 |
| Chen et al (2017)<br><i>In vitro Demonstration of Cancer Inhibiting Properties from Stratified Self-Organized Plasma-Liquid Interface</i> | 1 | 0 | 1 | 1 | 1 | 1 | 1 | 1 | 1 | 0 | 1 | 1 | 1 | 1 | 0 | 1 | 1 | 1 |
| Cheng et al (2021)                                                                                                                        | 1 | 0 | 1 | 1 | 1 | 1 | 1 | 0 | 1 | 0 | 1 | 1 | 1 | 1 | 0 | 1 | 1 | 1 |
| Chuang et al (2012)                                                                                                                       | 1 | 0 | 1 | 0 | 1 | 1 | 1 | 0 | 1 | 0 | 1 | 1 | 1 | 1 | 0 | 1 | 1 | 1 |
| Di et al (2009)                                                                                                                           | 1 | 0 | 1 | 1 | 1 | 1 | 1 | 0 | 0 | 0 | 1 | 1 | 1 | 0 | 1 | 1 | 1 | 1 |
| Frankfurt & Krishan (2003)                                                                                                                | 1 | 0 | 1 | 0 | 1 | 1 | 1 | 1 | 0 | 0 | 1 | 1 | 1 | 0 | 1 | 0 | 1 | 1 |
| Halfter et al (2016)                                                                                                                      | 1 | 0 | 0 | 0 | 1 | 1 | 1 | 0 | 0 | 1 | 1 | 1 | 1 | 1 | 1 | 1 | 1 | 1 |
| Hassan et al (2017)                                                                                                                       | 1 | 0 | 1 | 0 | 1 | 0 | 0 | 0 | 1 | 0 | 1 | 1 | 1 | 0 | 0 | 1 | 1 | 1 |
| Hernández-Vargas et al (2007)                                                                                                             | 1 | 0 | 1 | 1 | 1 | 1 | 1 | 0 | 1 | 0 | 1 | 1 | 1 | 1 | 0 | 0 | 1 | 1 |
| Izbicka et al (2005)                                                                                                                      | 1 | 0 | 1 | 1 | 1 | 1 | 1 | 0 | 1 | 0 | 1 | 1 | 0 | 1 | 0 | 1 | 1 | 1 |
| Jezeh et al (2020)                                                                                                                        | 1 | 0 | 1 | 1 | 1 | 1 | 1 | 1 | 1 | 0 | 1 | 1 | 1 | 1 | 1 | 1 | 1 | 1 |
| Keung et al (2020)                                                                                                                        | 1 | 0 | 1 | 1 | 1 | 1 | 1 | 0 | 1 | 0 | 1 | 1 | 1 | 1 | 0 | 1 | 1 | 1 |
| Kibria et al (2014)                                                                                                                       | 1 | 0 | 1 | 0 | 1 | 1 | 1 | 0 | 0 | 0 | 1 | 1 | 1 | 1 | 1 | 1 | 1 | 1 |
| Kim et al (2003)                                                                                                                          | 1 | 0 | 1 | 0 | 1 | 1 | 1 | 0 | 0 | 0 | 1 | 1 | 1 | 1 | 0 | 1 | 1 | 1 |
| Koechli et al (1993)                                                                                                                      | 1 | 0 | 1 | 0 | 1 | 1 | 1 | 0 | 1 | 0 | 1 | 1 | 1 | 1 | 0 | 1 | 1 | 1 |
| Koechli et al (1994)                                                                                                                      | 1 | 0 | 1 | 0 | 1 | 1 | 1 | 0 | 1 | 1 | 1 | 1 | 1 | 1 | 0 | 1 | 1 | 1 |

|                                                                                                                                                               |   |   |   |   |   |   |   |   |   |   |   |   |   |   |   |   |   |   |
|---------------------------------------------------------------------------------------------------------------------------------------------------------------|---|---|---|---|---|---|---|---|---|---|---|---|---|---|---|---|---|---|
| Konecny et al (2001)                                                                                                                                          | 1 | 0 | 1 | 0 | 1 | 1 | 0 | 0 | 1 | 0 | 1 | 1 | 1 | 1 | 0 | 1 | 1 | 1 |
| Lafontaine et al (2020)                                                                                                                                       | 1 | 0 | 1 | 1 | 1 | 1 | 1 | 1 | 1 | 0 | 1 | 1 | 0 | 1 | 0 | 1 | 1 | 1 |
| Liu et al (2017)                                                                                                                                              | 1 | 0 | 1 | 1 | 1 | 1 | 1 | 1 | 1 | 0 | 1 | 1 | 1 | 1 | 0 | 1 | 1 | 1 |
| Ly et al (2020)                                                                                                                                               | 1 | 0 | 1 | 1 | 1 | 1 | 1 | 1 | 1 | 0 | 1 | 1 | 1 | 1 | 0 | 1 | 1 | 1 |
| Ma et al (2017)<br><i>Study on inhibitory effect of paclitaxel on MEK and ERK protein overexpression and activation in different breast cancer cell lines</i> | 1 | 0 | 1 | 0 | 1 | 1 | 1 | 0 | 0 | 0 | 1 | 1 | 0 | 1 | 0 | 1 | 1 | 1 |
| Ma et al (2020)<br><i>Non-thermal plasma induces apoptosis accompanied by protective autophagy via activating JNK/Sestrin2 pathway</i>                        | 1 | 0 | 1 | 1 | 1 | 1 | 1 | 0 | 1 | 0 | 1 | 1 | 1 | 1 | 0 | 1 | 1 | 1 |
| McCloskey et al (1996)                                                                                                                                        | 1 | 0 | 1 | 1 | 1 | 1 | 1 | 0 | 0 | 0 | 1 | 1 | 1 | 1 | 0 | 0 | 1 | 1 |
| Merrill et al (2019)                                                                                                                                          | 1 | 0 | 1 | 1 | 1 | 0 | 1 | 0 | 1 | 0 | 1 | 1 | 1 | 1 | 0 | 1 | 1 | 1 |
| Mihai et al (2022)                                                                                                                                            | 1 | 0 | 1 | 1 | 1 | 1 | 1 | 1 | 1 | 0 | 1 | 1 | 1 | 1 | 0 | 1 | 1 | 1 |
| Morse et al (2005)                                                                                                                                            | 1 | 0 | 1 | 0 | 1 | 1 | 1 | 0 | 1 | 0 | 1 | 1 | 1 | 1 | 1 | 1 | 1 | 1 |
| Moschetta-Pinheiro et al (2022)                                                                                                                               | 1 | 0 | 1 | 1 | 1 | 1 | 1 | 0 | 1 | 0 | 1 | 1 | 1 | 1 | 0 | 1 | 1 | 1 |
| Munõz et al (2019)                                                                                                                                            | 1 | 0 | 1 | 1 | 1 | 0 | 1 | 0 | 1 | 0 | 1 | 1 | 1 | 1 | 0 | 1 | 1 | 1 |
| Ninomiya et al (2013)                                                                                                                                         | 1 | 0 | 1 | 1 | 1 | 1 | 1 | 0 | 1 | 0 | 1 | 1 | 1 | 1 | 1 | 0 | 1 | 1 |
| Norris et al (2013)                                                                                                                                           | 1 | 0 | 1 | 1 | 1 | 1 | 0 | 0 | 1 | 0 | 1 | 1 | 0 | 1 | 0 | 0 | 1 | 1 |
| Oncul et al (2017)                                                                                                                                            | 1 | 0 | 1 | 0 | 1 | 1 | 1 | 0 | 1 | 0 | 1 | 1 | 1 | 1 | 1 | 1 | 1 | 1 |
| Park et al (2015)                                                                                                                                             | 1 | 0 | 1 | 1 | 1 | 1 | 1 | 0 | 1 | 0 | 1 | 1 | 1 | 1 | 0 | 1 | 1 | 1 |
| Parrella et al (2014)                                                                                                                                         | 1 | 0 | 1 | 0 | 1 | 1 | 1 | 0 | 0 | 0 | 1 | 1 | 0 | 1 | 0 | 0 | 1 | 1 |

|                              |   |   |   |   |   |   |   |   |   |   |   |   |   |   |   |   |   |   |
|------------------------------|---|---|---|---|---|---|---|---|---|---|---|---|---|---|---|---|---|---|
| Pilco-Ferreto & Calaf (2016) | 1 | 0 | 1 | 1 | 1 | 1 | 1 | 0 | 1 | 0 | 1 | 1 | 1 | 1 | 0 | 1 | 1 | 1 |
| Risinger et al (2015)        | 1 | 0 | 1 | 1 | 1 | 1 | 1 | 0 | 0 | 0 | 1 | 1 | 0 | 1 | 0 | 1 | 1 | 1 |
| Sauter et al (1986)          | 1 | 0 | 1 | 0 | 1 | 1 | 1 | 0 | 0 | 0 | 1 | 1 | 0 | 0 | 0 | 0 | 0 | 0 |
| Stope et al (2020)           | 1 | 0 | 1 | 0 | 1 | 1 | 1 | 1 | 1 | 0 | 1 | 1 | 1 | 1 | 0 | 1 | 1 | 1 |
| Subramanian et al (2020)     | 1 | 0 | 1 | 1 | 1 | 0 | 1 | 1 | 1 | 0 | 1 | 1 | 1 | 1 | 0 | 1 | 1 | 1 |
| Taherian et al (2012)        | 1 | 0 | 1 | 0 | 1 | 1 | 1 | 0 | 0 | 0 | 1 | 1 | 0 | 1 | 1 | 1 | 1 | 1 |
| Tassone et al (2003)         | 1 | 0 | 1 | 0 | 1 | 1 | 1 | 0 | 1 | 0 | 1 | 1 | 1 | 1 | 0 | 1 | 1 | 1 |
| Terefinko et al (2021)       | 1 | 0 | 1 | 1 | 1 | 1 | 1 | 1 | 1 | 0 | 1 | 1 | 1 | 1 | 0 | 1 | 1 | 1 |
| Wali et al (2017)            | 1 | 0 | 0 | 0 | 1 | 0 | 0 | 0 | 1 | 0 | 1 | 1 | 0 | 0 | 0 | 0 | 0 | 1 |
| Wang et al (2013)            | 1 | 0 | 1 | 1 | 1 | 1 | 1 | 1 | 1 | 0 | 1 | 1 | 1 | 1 | 0 | 1 | 1 | 1 |
| Wang et al (2021)            | 1 | 0 | 1 | 1 | 1 | 1 | 1 | 1 | 1 | 0 | 1 | 1 | 1 | 1 | 0 | 1 | 1 | 1 |
| Wesierska-Gadek et al (2015) | 1 | 0 | 1 | 1 | 1 | 1 | 1 | 0 | 1 | 0 | 1 | 1 | 1 | 1 | 0 | 1 | 1 | 1 |
| Xiang et al (2018)           | 1 | 0 | 1 | 1 | 1 | 1 | 1 | 1 | 1 | 0 | 1 | 1 | 1 | 1 | 0 | 1 | 1 | 1 |
| Yan et al (2015)             | 1 | 0 | 1 | 1 | 1 | 1 | 1 | 1 | 1 | 0 | 1 | 1 | 1 | 1 | 0 | 1 | 1 | 1 |
| Yan et al (2017)             | 1 | 0 | 1 | 1 | 1 | 1 | 1 | 0 | 1 | 0 | 1 | 1 | 1 | 1 | 0 | 1 | 1 | 1 |
| Yaourtis et al (2023)        | 1 | 0 | 0 | 1 | 1 | 0 | 0 | 0 | 1 | 0 | 1 | 1 | 1 | 1 | 1 | 1 | 1 | 1 |
| Zasadil et al (2014)         | 1 | 0 | 0 | 1 | 1 | 1 | 1 | 0 | 1 | 0 | 1 | 1 | 1 | 1 | 0 | 1 | 1 | 1 |
